# Supplementary material for: A Germinal Center Checkpoint of AIRE in B Cells Limits Antibody Diversification
Source: PubMed Central journal article supplement — bioRxiv. 2024 Jan 12:2024.01.10.574926. Preprint. [Version 1] doi: 10.1101/2024.01.10.574926 (PMC10802573; doi:10.1101/2024.01.10.574926), 2024-01-12
Supplement: NIHPP2024.01.10.574926v1-supplement-1.pdf [file NIHPP2024.01.10.574926v1-supplement-1.pdf]

896 **SUPPLEMENTAL INFORMATION**

897

898 **SUPPLEMENTAL TABLES**

899 Table S1. *Aire*<sup>-/-</sup> CH12 Cell Clones, Related to Figure 4 and Figure 5.

| Clone | Mutation(s) and alleles                                                                                                                                                                                                                                                                                                                                                                                                                                                                                                                                                                                                                                                                                                                                                                                                                                                                                                                                                                                                                                                                                                                                                                                                                                                                                                                                                                                                                                                                                                                                                                                                                                                                                                                                                                                                                                                                                                                                                                                                                                                                                                                                                                                                                                                                                                                                                                                                                                                                                                                                                                                                                                                                                                                                                                                                                                               | Sequencing histogram |
|-------|-----------------------------------------------------------------------------------------------------------------------------------------------------------------------------------------------------------------------------------------------------------------------------------------------------------------------------------------------------------------------------------------------------------------------------------------------------------------------------------------------------------------------------------------------------------------------------------------------------------------------------------------------------------------------------------------------------------------------------------------------------------------------------------------------------------------------------------------------------------------------------------------------------------------------------------------------------------------------------------------------------------------------------------------------------------------------------------------------------------------------------------------------------------------------------------------------------------------------------------------------------------------------------------------------------------------------------------------------------------------------------------------------------------------------------------------------------------------------------------------------------------------------------------------------------------------------------------------------------------------------------------------------------------------------------------------------------------------------------------------------------------------------------------------------------------------------------------------------------------------------------------------------------------------------------------------------------------------------------------------------------------------------------------------------------------------------------------------------------------------------------------------------------------------------------------------------------------------------------------------------------------------------------------------------------------------------------------------------------------------------------------------------------------------------------------------------------------------------------------------------------------------------------------------------------------------------------------------------------------------------------------------------------------------------------------------------------------------------------------------------------------------------------------------------------------------------------------------------------------------------|----------------------|
| 43    | <p><b>Allele 1</b></p> <p><i>Aire</i> exon 3 Val Asp Leu Asn Gln Ser Arg Lys Gly Arg Lys Pro Leu Ala Gly Pro Lys Ala Ala Val Leu Pro Pro Arg Pro Pro</p> <p>TTCCTGCCCC <b>TGAGCTGCAG</b> <b>ATGTGGACCT</b> <b>AAACCAGTCC</b> <b>CGGAAGGGA</b> <b>GAAAGCCCCT</b> <b>TGCTGGTCCC</b> <b>AAGGCCGCGG</b> <b>TACTGCCACC</b> <b>CAGACCCCCC</b><br/> <b>AAGGACGGGG</b> <b>ACTCGACGTC</b> <b>TACACCTGGA</b> <b>TTTGGTCAGG</b> <b>GCCTTTCCTC</b> <b>CTTTCGGGGA</b> <b>ACGACCAGGG</b> <b>TTCCGGCGCC</b> <b>ATGACGGTGG</b> <b>GTCTGGGGGG</b></p> <p>His Gln Glu Lys Ser Thr Gly Gly Ala Ser Ser His Pro Thr Ser Asn Ser Gly Leu Lys Glu Arg Leu Gln Pro<br/>     Thr Lys Arg Lys Ala Leu Glu Pro Arg Ala Thr Pro Pro Ala Thr Leu Ala Ser Lys Ser Val Ser Ser Pro</p> <p><b>ACCAAGAGAA</b> <b>AAGCACTGGA</b> <b>GGAGCCTCGA</b> <b>GCCACCCAC</b> <b>CAGCAACTCT</b> <b>GGCCTCAAAG</b> <b>AGCGTCTCCA</b> <b>GCCCAGSTAC</b> <b>ACTCAAGAGG</b> <b>AGCTAGCCAG</b><br/> <b>TGGTTCCTTT</b> <b>TTCGTGACCT</b> <b>CCTCGGAGCT</b> <b>CGGTGGGGTG</b> <b>GTCGTTGAGA</b> <b>CCGGAGTTTC</b> <b>TCCGAGAGGT</b> <b>CGGGTCCATG</b> <b>TGAGTTCCTC</b> <b>TCGATCGGTC</b></p> <p>GGTGTCTGGG CCTTCCCAA CCGGCTCTTA GGAGCTTCTG TCTTACTGAC ACCACCCAG GGCAGCCTG CCAGGGTCCAG AGAGTCACTT CTGAGCCCTC<br/>     CCAACGACCC GGGAGSGGTT GSCCGAGAAT CCTCGAAGAC AGAATGACTG TGGTGGGGTC CCGTCCGAC GGTCCCAAGT TCTCAGTGA GACTCGGGAG</p> <p>AGACCTGAGC ATTGGAGGAG GCCACAGCC TCTCAGCGTC TTTACTGTCC AAAGGCTGAG TTTCTGGGCG GTGAGGCAGG CAGGTGGTTT TGATTCCTTT<br/>     TCTGGACTCG TAACCTCCTC CGSGTGTCCG AGAGTCCGAG AATGACAGGG TTTCCGACTC AAAGACCCGC CACTCCGTCC GTCCACAAA ACTAAGGAA</p> <p>TCTGTGAAG AAGGAAACAG CCCATCACAG CTTAAGAACC CCCTTACCAG CTGCTCTCTC TCCCATCTC ACTTCTACC CTGATCCGT<br/>     AGACAACCTC TTCCTTTGTC GGGTAGTGTG GAATTTCTGG CAGCTAGACT GGAATGGTTC GACGAGAGAG AGGGTAGGAG TGAAGATGG GACCTAGGCA</p> <p><i>Aire</i> exon 4 Leu Pro Pro Glu Asp *** Ala Pro *** Glu Ala Arg Trp Gln<br/>     Ser His Leu Lys Thr Lys Pro Pro Lys Lys Pro Asp Gly Asn</p> <p>CAACATGACC CCAGCCAGA AAGTGGGCC CAGGCTGCCT CTACCTCCC TTCGAGGCT <b>CCCACCTGAA</b> <b>GACTAAGCCC</b> <b>CCTAAGAAGC</b> <b>CAGATGGCAA</b><br/> <b>GTTGTA</b>CTGG <b>GGTCGGGCT</b> <b>TTTACCCCG</b> <b>GTCGACGGA</b> <b>GATGGAGGG</b> <b>AAGCGTC</b> <b>CGA</b> <b>GGTGGACTT</b> <b>CTGATT</b> <b>CGGG</b> <b>GGATTCTTCG</b> <b>GTCTACCGTT</b></p> <p>Leu Gly Val Thr Ala Pro Ser Ser Trp Lys<br/>     Asn Leu Glu Ser Gln His Leu Pro Leu Gly Asn</p> <p><b>CTTGGAGTCA</b> <b>CAGCACCTTC</b> <b>CTCTTGAAA</b> <b>CGSTGAGTTA</b> <b>GGCCAAAGT</b> <b>GGAGTTGGA</b> <b>GGAGGTCTGA</b> <b>TCCATTGAC</b> <b>CTCAGCTGGA</b> <b>TGGCAAAGCC</b><br/> <b>GAACCTCAGT</b> <b>GTCTGGAAG</b> <b>GAGAACCTTT</b> <b>GCCTACTCAAT</b> <b>CCGGTCTCA</b> <b>CCTCCAACT</b> <b>CCTCCAGACT</b> <b>AGGGTAACTG</b> <b>GAGTCGACCT</b> <b>ACCGTTTCGG</b></p>                        |                      |
|       | <p><b>Allele 2</b></p> <p><i>Aire</i> exon 3 Val Asp Leu Asn Gln Ser Arg Lys Gly Arg Lys Pro Leu Ala Gly Pro Lys Ala Ala Val Leu Pro Pro Arg Pro Pro</p> <p>TTCCTGCCCC <b>TGAGCTGCAG</b> <b>ATGTGGACCT</b> <b>AAACCAGTCC</b> <b>CGGAAGGGA</b> <b>GAAAGCCCCT</b> <b>TGCTGGTCCC</b> <b>AAGGCCGCGG</b> <b>TACTGCCACC</b> <b>CAGACCCCCC</b><br/> <b>AAGGACGGGG</b> <b>ACTCGACGTC</b> <b>TACACCTGGA</b> <b>TTTGGTCAGG</b> <b>GCCTTTCCTC</b> <b>CTTTCGGGGA</b> <b>ACGACCAGGG</b> <b>TTCCGGCGCC</b> <b>ATGACGGTGG</b> <b>GTCTGGGGGG</b></p> <p>Pro Pro Arg Glu Lys His Trp Arg Ser Leu Glu Pro Pro His Gln Gln Leu Trp Pro Gln Arg Ala Ser Pro Ala Gln<br/>     Thr Lys Arg Lys Ala Leu Glu Pro Arg Ala Thr Pro Pro Ala Thr Leu Ala Ser Lys Ser Val Ser Ser Pro</p> <p><b>ACCAAGAGAA</b> <b>AAGCACTGGA</b> <b>GGAGCCTCGA</b> <b>GCCACCCAC</b> <b>CAGCAACTCT</b> <b>GGCCTCAAAG</b> <b>AGCGTCTCCA</b> <b>GCCCAGSTAC</b> <b>ACTCAAGAGG</b> <b>AGCTAGCCAG</b><br/> <b>TGGTTCCTTT</b> <b>TTCGTGACCT</b> <b>CCTCGGAGCT</b> <b>CGGTGGGGTG</b> <b>GTCGTTGAGA</b> <b>CCGGAGTTTC</b> <b>TCCGAGAGGT</b> <b>CGGGTCCATG</b> <b>TGAGTTCCTC</b> <b>TCGATCGGTC</b></p> <p>GGTGTCTGGG CCTTCCCAA CCGGCTCTTA GGAGCTTCTG TCTTACTGAC ACCACCCAG GGCAGCCTG CCAGGGTCCAG AGAGTCACTT CTGAGCCCTC<br/>     CCAACGACCC GGGAGSGGTT GSCCGAGAAT CCTCGAAGAC AGAATGACTG TGGTGGGGTC CCGTCCGAC GGTCCCAAGT TCTCAGTGA GACTCGGGAG</p> <p>AGACCTGAGC ATTGGAGGAG GCCACAGCC TCTCAGCGTC TTTACTGTCC AAAGGCTGAG TTTCTGGGCG GTGAGGCAGG CAGGTGGTTT TGATTCCTTT<br/>     TCTGGACTCG TAACCTCCTC CGSGTGTCCG AGAGTCCGAG AATGACAGGG TTTCCGACTC AAAGACCCGC CACTCCGTCC GTCCACAAA ACTAAGGAA</p> <p>TCTGTGAAG AAGGAAACAG CCCATCACAG CTTAAGAACC CTGATCTGTA CCCTTACCAG CTGCTCTCTC TCCCATCTC ACTTCTACC CTGATCCGT<br/>     AGACAACCTC TTCCTTTGTC GGGTAGTGTG GAATTTCTGG CAGCTAGACT GGAATGGTTC GACGAGAGAG AGGGTAGGAG TGAAGATGG GACCTAGGCA</p> <p><i>Aire</i> exon 4 Ala Pro Thr *** Arg Leu Ser Pro Leu Arg Ser Gln Met Ala Thr<br/>     Ser His Leu Lys Thr Lys Pro Pro Lys Lys Pro Asp Gly Asn</p> <p>CAACATGACC CCAGCCAGA AAGTGGGCC CAGGCTGCCT CTACCTCCC TTCGAGGCT <b>CCCACCTGAA</b> <b>GACTAAGCCC</b> <b>CCTAAGAAGC</b> <b>CAGATGGCAA</b><br/> <b>GTTGTA</b>CTGG <b>GGTCGGGCT</b> <b>TTTACCCCG</b> <b>GTCGACGGA</b> <b>GATGGAGGG</b> <b>AAGCGTC</b> <b>CGA</b> <b>GGTGGACTT</b> <b>CTGATT</b> <b>CGGG</b> <b>GGATTCTTCG</b> <b>GTCTACCGTT</b></p> <p>Thr Trp Ser His Ser Thr Phe Leu Leu Glu Thr<br/>     Asn Leu Glu Ser Gln His Leu Pro Leu Gly Asn</p> <p><b>CTTGGAGTCA</b> <b>CAGCACCTTC</b> <b>CTCTTGAAA</b> <b>CGSTGAGTTA</b> <b>GGCCAAAGT</b> <b>GGAGTTGGA</b> <b>GGAGGTCTGA</b> <b>TCCATTGAC</b> <b>CTCAGCTGGA</b> <b>TGGCAAAGCC</b><br/> <b>GAACCTCAGT</b> <b>GTCTGGAAG</b> <b>GAGAACCTTT</b> <b>GCCTACTCAAT</b> <b>CCGGTCTCA</b> <b>CCTCCAACT</b> <b>CCTCCAGACT</b> <b>AGGGTAACTG</b> <b>GAGTCGACCT</b> <b>ACCGTTTCGG</b></p> |                      |

Allele 1

**Aire exon 3**

Pro Cys Trp Ser Gln Gly Arg Gly Thr Ala Thr Gln Thr Pro His  
 Val Asp Leu Asn Gln Ser Arg Lys Gly Arg Lys Pro Leu Ala Gly Pro Lys Ala Ala Val Leu Pro Pro Arg Pro Pro

TTCTGCCCC TGAGCTGCAG ATGTGGACCT AAACCACTCC CGAAAGGGA GAAAGCCCCT TGCTGGTCCC AAGGCCGCGG TACTGCCACC CAGACCCCCC  
 AAGGACGGGG ACTCGACGTC TACACCTGGA TTTGGTCAGG GCCTTTCCCT CTTTCGGGGA ACGACCAGGG TTCCGGCGCC ATGACGGTGG GTCTGGGGGG

His Gln Glu Lys Ser Thr Gly Gly Ala Ser Ser His Pro Thr Ser Asn Ser Gly Leu Lys Glu Arg Leu Gln Pro  
 Thr Lys Arg Lys Ala Leu Glu Glu Pro Arg Ala Thr Pro Pro Ala Thr Leu Ala Ser Lys Ser Val Ser Ser Pro

ACCAAGAGAA AAGCACTGGA GGAGCCTCGA GCCACCCAC CAGCAACTCT GGCCTCAAAG AGCCTCTCCA GCCAGSTAC ACTCAAGAGG AGCTAGCCAG  
 TGGTTCTCTT TTCGTGACCT CCTCGGAGCT CGGTGGGGTG GTCGTTGAGA CCGGAGTTTC TCGCAGAGGT CCGGTCATG TGAGTTCTCC TCGATCGGTC

GTTGTCTGGG CCTCCCCAA CCGGCTCTTA GGAGCTTCTG TCTTACTGAC ACCACCCAG GGCAGCCTG CCAGGTCAC AGAGTCACCT CTGAGCCCTC  
 CCAACGACCC GGGAGGGGTT GGCCGAGAAT CCTCGAAGAC AGAATGACTG TGSTGGGGTC CCGGTCGGAC GGTCCAGTG TCTCAGTGA GACTCGGGAG

AGACCTGAGC ATTGGAGGAG GCCACAGCC TCTCAGCGTC TTTACTGTCC AAAGGCTGAG TTTCTGGGCG GTGAGGCAGG CAGGTGGTTT TGATTTCTTT  
 TCTGGACTCG TAACCTCCTC CGGGTGTCGG AGAGTCGCAG AATGACAGGG TTTCGACTC AAAGACCCCG CACTCCGTCG GTCCACCAA ACTAAAGGAA

TCTGTTGAAG AAGSAAACAG CCCATCACAG CTTAAGAACC GTCGATCTGA CCTTACCAG CTGCTCTCTC TCCATCCTC ACTTTCTACC CTGGATCCGT  
 AGACAACCTT TTCCTTTGTC GGGTAGTGTG GAATTTCTGG CAGCTAGACT GGAATGGTGC GACGAGAGAG AGGGTAGGAG TGAAGATGG GACCTAGGCA

**Aire exon 4**

Leu Pro Pro Glu Asp \* Ala Pro \* Glu Ala Arg Trp Gln  
 Ser His Leu Lys Thr Lys Pro Pro Lys Lys Pro Asp Gly Asn

CAACATGACC CCAGCCCAGA AAAGTGGGCC CAGGCTGCCT CTACCTCCCC TTGCGAGGCT CCCACCTGAA GACTAAGCCC CTAAGAAGC CAGATGGCAA  
 GTTGACTGG GGTCCGGTCT TTTACCCCGG GTCCGACGGA GATGGAGGGG AAGCGTCGA GGGTGGACTT CTGATTCGGG GGATTTCTCG GTCACCGTT

Leu Gly Val Thr Ala Pro Ser Ser Trp Lys  
 Asn Leu Glu Ser Gln His Leu Pro Leu Gly Asn

CTTGGAGTCA CAGCACCTTC CTCTTGGAAA CGSTGAGTTA GGCCAAGAGT GGAGGTTGGA GGAGGTCGTA TCCATTGAC CTCAGCTGGA TGGCAAAGCC  
 GAACCTCAGT GTCGTGGAAG GAGAACCTTT GCCTACTCAAT CCGGTTCTCA CCTCCAACCT CCTCCAGACT AGGGTAACTG GAGTCGACCT ACCGTTTCGG

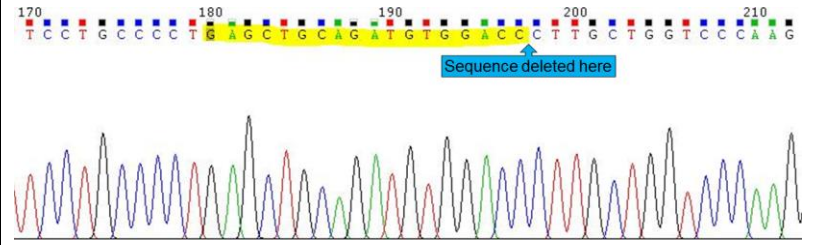

Allele 2

**Aire exon 3**

Pro Cys Trp Ser Gln Gly Arg Gly Thr Ala Thr Gln Thr Pro His  
 Val Asp Leu Asn Gln Ser Arg Lys Gly Arg Lys Pro Leu Ala Gly Pro Lys Ala Ala Val Leu Pro Pro Arg Pro Pro

TTCTGCCCC TGAGCTGCAG ATGTGGACCT AAACCACTCC CGAAAGGGA GAAAGCCCCT TGCTGGTCCC AAGGCCGCGG TACTGCCACC CAGACCCCCC  
 AAGGACGGGG ACTCGACGTC TACACCTGGA TTTGGTCAGG GCCTTTCCCT CTTTCGGGGA ACGACCAGGG TTCCGGCGCC ATGACGGTGG GTCTGGGGGG

His Gln Glu Lys Ser Thr Gly Gly Ala Ser Ser His Pro Thr Ser Asn Ser Gly Leu Lys Glu Arg Leu Gln Pro  
 Thr Lys Arg Lys Ala Leu Glu Glu Pro Arg Ala Thr Pro Pro Ala Thr Leu Ala Ser Lys Ser Val Ser Ser Pro

ACCAAGAGAA AAGCACTGGA GGAGCCTCGA GCCACCCAC CAGCAACTCT GGCCTCAAAG AGCCTCTCCA GCCAGSTAC ACTCAAGAGG AGCTAGCCAG  
 TGGTTCTCTT TTCGTGACCT CCTCGGAGCT CGGTGGGGTG GTCGTTGAGA CCGGAGTTTC TCGCAGAGGT CCGGTCATG TGAGTTCTCC TCGATCGGTC

GTTGTCTGGG CCTCCCCAA CCGGCTCTTA GGAGCTTCTG TCTTACTGAC ACCACCCAG GGCAGCCTG CCAGGTCAC AGAGTCACCT CTGAGCCCTC  
 CCAACGACCC GGGAGGGGTT GGCCGAGAAT CCTCGAAGAC AGAATGACTG TGSTGGGGTC CCGGTCGGAC GGTCCAGTG TCTCAGTGA GACTCGGGAG

AGACCTGAGC ATTGGAGGAG GCCACAGCC TCTCAGCGTC TTTACTGTCC AAAGGCTGAG TTTCTGGGCG GTGAGGCAGG CAGGTGGTTT TGATTTCTTT  
 TCTGGACTCG TAACCTCCTC CGGGTGTCGG AGAGTCGCAG AATGACAGGG TTTCGACTC AAAGACCCCG CACTCCGTCG GTCCACCAA ACTAAAGGAA

TCTGTTGAAG AAGSAAACAG CCCATCACAG CTTAAGAACC GTCGATCTGA CCTTACCAG CTGCTCTCTC TCCATCCTC ACTTTCTACC CTGGATCCGT  
 AGACAACCTT TTCCTTTGTC GGGTAGTGTG GAATTTCTGG CAGCTAGACT GGAATGGTGC GACGAGAGAG AGGGTAGGAG TGAAGATGG GACCTAGGCA

**Aire exon 4**

Leu Pro Pro Glu Asp \* Ala Pro \* Glu Ala Arg Trp Gln  
 Ser His Leu Lys Thr Lys Pro Pro Lys Lys Pro Asp Gly Asn

CAACATGACC CCAGCCCAGA AAAGTGGGCC CAGGCTGCCT CTACCTCCCC TTGCGAGGCT CCCACCTGAA GACTAAGCCC CTAAGAAGC CAGATGGCAA  
 GTTGACTGG GGTCCGGTCT TTTACCCCGG GTCCGACGGA GATGGAGGGG AAGCGTCGA GGGTGGACTT CTGATTCGGG GGATTTCTCG GTCACCGTT

Leu Gly Val Thr Ala Pro Ser Ser Trp Lys  
 Asn Leu Glu Ser Gln His Leu Pro Leu Gly Asn

CTTGGAGTCA CAGCACCTTC CTCTTGGAAA CGSTGAGTTA GGCCAAGAGT GGAGGTTGGA GGAGGTCGTA TCCATTGAC CTCAGCTGGA TGGCAAAGCC  
 GAACCTCAGT GTCGTGGAAG GAGAACCTTT GCCTACTCAAT CCGGTTCTCA CCTCCAACCT CCTCCAGACT AGGGTAACTG GAGTCGACCT ACCGTTTCGG

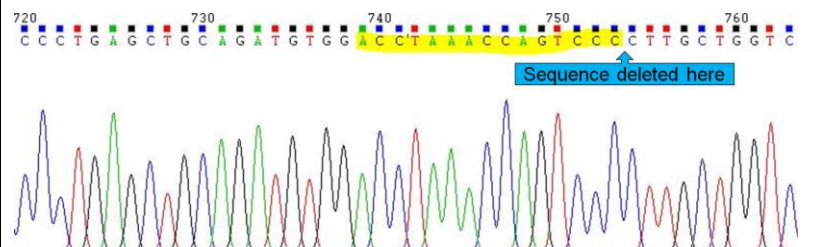

69

Both alleles

Aire exon 1    Met   Ala   Gly   Gly   Asp   Gly   Met   Leu   Arg   Arg   Leu

GAAGGGAGAA GGAACGCAA GCGCGCGTGG GCCAGCAGGG GCGCGCGAGG CCGAGCCCTT GTGAGGAAGA TGGCAGGTGG GGATGGAATG CTACGCCGTC  
 CTTCCTCTT CCCTTGCCTT CCGCGCGCACC CGGTGCTGCC CCGCGGCTCC CCGTGGGGA CACTCCTTCT ACCGTCCACC CCTACCTTAC GATGCGGCAG

---

Leu Leu Arg Leu His Arg Thr Glu Ile Ala Val Ala Ile Asp Ser Ala Phe Pro Leu Leu His Ala Leu Ala Asp His Asp Val Val Pro Glu Asp Lys Phe  
 Gly Gly His Arg Gln Cys Leu Ser Ala Ala Ala Cys Ser Ser Arg Pro Arg Arg Gly Pro "" Gly Gln Val

---

TGCTGAGGCT GCACCGCACC GAGATCGCGG TGGCCATAGA CAGTGCCTTT CCGTGCTGC ATGCTCTAGC CGACCACGAC GTGGTCCCTG AGGACAAGTT  
 ACGACTCCGA CGTGGCGTGG CTCTAGCGCC ACCGGTATCT GTCACGGAAA GGCACGACG TACGAGATCG GCTGGTGCTG CACCAGGGAC TCCTGTTCAA

---

Phe Gln  
 Pro  
 CCAGTGGGC TCCAGTCCCG CCCCAGGTGC CTCTATTCT CCCACTCCT CCACCCGAC ACTAGGTGTT CCTCCCAAC CTCAGCCAAA ACCCATACTA  
 GGTCACCCG AGGTCAGGC GGGGCCACG GAGAGTAAGA GGGGTGAGGA GGTGGGCGT TGATCCACAA GGGAGGGTT GAGTCGGTT TGGGTATGAT

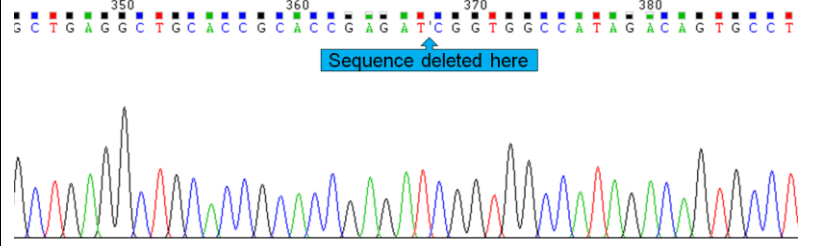

900

901 **Table S2. Human AIRE and AID Constructs, Related to Figure 4 and Figure 5.**

902 (A) Human AIRE constructs in pcDNA3.1(-)/Myc-His

| Name | Description                 | Remaining region | MW with tag (kDa) |
|------|-----------------------------|------------------|-------------------|
| WT   | Full length                 | 1-545            | 60.7              |
| M1   | $\Delta$ PHD2               | 1-430            | 48.8              |
| M2   | $\Delta$ PHD1, PHD2         | 1-298            | 35                |
| M3   | $\Delta$ SAND, PHD1, PHD2   | 1-181            | 23                |
| M4   | $\Delta$ CARD               | 101-545          | 49                |
| M5   | $\Delta$ CARD, $\Delta$ NLS | 181-545          | 41                |
| M6   | $\Delta$ NLS                | 1-100, 181-545   | 52.5              |
| M7   | NLS only                    | 101-181          | 12                |

903

904 (B) Human AID constructs in pFLAG-CMV2

| Name | Description                                   | Remaining region | MW with tag (kDa) |
|------|-----------------------------------------------|------------------|-------------------|
| WT   | Full length                                   | 1-198            | 26.3              |
| M1   | E58A                                          | 1-198            | 26.3              |
| M2   | NLS of AID replaced with NLS of nucleoplasmin | 1-198            | 26.3              |
| M3   | $\Delta$ Catalytic domain                     | 1-54, 95-198     | 21.4              |
| M4   | $\Delta$ APOBEC-like and $\Delta$ NES domains | 1-94             | 13.8              |
| M5   | $\Delta$ NLS                                  | 1-8, 27-198      | 24                |
| M6   | G23S                                          | 1-198            | 26.3              |

905

906 **Table S3. Cloning Primers Used to Generate *Aire*<sup>-/-</sup> CH12 Clones and AIRE and**  
 907 **AID Mutant Molecules, Related to Figure 4 and Figure 5.**

908 (A) Primers for cloning human AIRE constructs into pcDNA3.1(-)/Myc-His

| Name | Description       | Primer name and sequence (5'-3')                                            |
|------|-------------------|-----------------------------------------------------------------------------|
| WT   | Full length       | –                                                                           |
| M1   | ΔPHD2             | D430_R AGGAGCCAGGTTCTGCTGACC<br>Hind-Myc_F GAAAGCTTTCTAGAACAAAACTCATCTCA    |
| M2   | ΔPHD1, PHD2       | D298_R CTCGTCCTCATTCTTCTGGTGGAG<br>Hind-Myc_F GAAAGCTTTCTAGAACAAAACTCATCTCA |
| M3   | ΔSAND, PHD1, PHD2 | D181_R AATCCCGTTCCCGAGTGGAAAG<br>Hind-Myc_F GAAAGCTTTCTAGAACAAAACTCATCTCA   |
| M4   | ΔCARD             | EcoRV-ATG_R CATGGTGAATTCTGCAGATATCCAGC<br>D101_F CCCAAAGATGTGGACCTCAGCC     |
| M5   | ΔCARD, ΔNLS       | EcoRV-ATG_R CATGGTGAATTCTGCAGATATCCAGC<br>D181_F ATTCAGACCATGTCAGCTTCAGTCCA |
| M6   | ΔNLS              | D100_R GAAGCTGTCCAGGATGGGCTG<br>D181_F ATTCAGACCATGTCAGCTTCAGTCCA           |
| M7   | NLS only          | D181_R AATCCCGTTCCCGAGTGGAAAG<br>Hind-Myc_F GAAAGCTTTCTAGAACAAAACTCATCTCA   |

909

910 (B) Primers for cloning human AID constructs into pFLAG-CMV2

| Name | Description                                   | Primer name and sequence (5'-3')                                                                                                                                                                                                                                     |
|------|-----------------------------------------------|----------------------------------------------------------------------------------------------------------------------------------------------------------------------------------------------------------------------------------------------------------------------|
| M1   | E58A                                          | AID_F ATGGACAGCCTCTTGATGAACCG<br>AID_R AAGTCCCAAAGTACGAAATGCGTC                                                                                                                                                                                                      |
| M2   | NLS of AID replaced with NLS of nucleoplasmin | npNLS_top<br>AAAAGGCCGGCGGCCACGAAAAAGGCCGGCCAGGCCAAAAAGAAAAAG<br>npNLS_bottom<br>CTTTTTCTTTTTGCCTGGCCGGCCTTTTTCGTGGCCGCCGGCCTTTTT<br>(npNLS_top and npNLS_bottom were annealed together before ligation with the PCR product of the primer pair AID8_R and AID27_F.) |
| M3   | ΔCatalytic domain                             | AID54_R GCCGTTCTTATTGCGAAGATAACCA<br>AID95_F GCCGACTTTCTGCGAGGGA                                                                                                                                                                                                     |
| M4   | ΔAPOBEC-like and ΔNES domains                 | AID94_R CACATGTCGGGCACAGTCGTAG<br>TAG_F TAGACTGAACTTTTTTGGGGGAGGG                                                                                                                                                                                                    |

|    |              |                                                                        |
|----|--------------|------------------------------------------------------------------------|
| M5 | $\Delta$ NLS | AID8_R CCGGTTTCATCAAGAGGCTGTCC<br>AID27_F ACCTACCTGTGCTACGTAGTGAAGAGGC |
| M6 | G23S         | AID22_R CTTAGCCCAGCGGACATTTTGA<br>AIDS23_F AGTCGGCGTGAGACCTACCTGTG     |

911

912 (C) Cloning primers for generating pCMV-Tag1-mAire-GFP plasmids

| Description                                   | Primer name and sequence (5'-3')                                    |
|-----------------------------------------------|---------------------------------------------------------------------|
| Full length Aire                              | -                                                                   |
| Aire $\Delta$ NLS                             | D106_R GTCCACATCTTTTGGGAAGCCG<br>D182_F ATTCAGACCATGGCAGCTTCTGTG    |
| Full length eGFP                              | GFP_F ATGGTGAGCAAGGGCGAGGAG<br>GFP_R CTTGTACAGCTCGTCCATGCCG         |
| Aire of Aire $\Delta$ NLS in pCMV-Tag1 vector | TGA-SalI_F TGATGACAGGTCGACCTCGAGC<br>AIRE_R GGAAGAGAAGGGTGGTGTCTCGG |

913

914 (D) Oligos used to clone sgRNA into targeting vectors

| Description                                      | Oligo name and sequence (5'-3')   |
|--------------------------------------------------|-----------------------------------|
| <i>Aire</i> <sup>-/-</sup> CH12 clone 69         | _Top CACCGGCACCGCACCGAGATCGCGG    |
|                                                  | _Bottom AAACCCGCGATCTCGGTGCGGTGCC |
| <i>Aire</i> <sup>-/-</sup> CH12 clones 43 and 53 | _Top CACCGACCTAAACCAGTCCCGGAAA    |
|                                                  | _Bottom AAACCTTCCGGGACTGGTTTAGGTC |

915

916 **SUPPLEMENTAL FIGURE LEGENDS**

917 **Figure S1. AIRE Is Expressed Specifically in GC B Cells of Human and Mouse**  
918 **Secondary Lymphoid Organs, Related to Figure 1.**

919 (A) Immunofluorescence analysis of the thymus of a healthy donor for EpCAM, AIRE and  
920 DNA. Bars: 20  $\mu\text{m}$ .

921 (B and C) Immunofluorescence analysis of tonsillar tissues of healthy donors for IgD, AIRE,  
922 CD19, Pax5, Bcl-6 and DNA. The dotted lines mark the boundary between tonsil follicular  
923 mantle zone and the follicle. Arrow heads point to follicular IgD<sup>+</sup> plasmablasts (B) and  
924 Pax5<sup>+</sup>Bcl-6<sup>+</sup>AIRE<sup>+</sup> GC B cells (C). Bars: 15  $\mu\text{m}$  (B) and 30  $\mu\text{m}$  (C).

925 (D) Flow cytometric analysis of AIRE expression in human peripheral blood naive (IgD<sup>+</sup>CD27<sup>-</sup>),  
926 MZ (IgD<sup>+</sup>CD27<sup>+</sup>), switched memory (IgD<sup>-</sup>CD27<sup>+</sup>), double-negative (IgD<sup>-</sup>CD27<sup>-</sup>) B cells, and  
927 transitional (CD24<sup>hi</sup>CD38<sup>hi</sup>), mature (CD24<sup>int</sup>CD38<sup>int</sup>), memory (CD24<sup>hi</sup>CD38<sup>-</sup>) B cells and  
928 plasma cells (CD24<sup>-</sup>CD38<sup>hi</sup>).

929 (E) Immunofluorescence analysis of the thymic tissue of a B6 mouse for UEA-1, AIRE and  
930 DNA, and the splenic tissue of a B6 mouse immunized with 3 doses of sheep red blood cells  
931 (SRBCs) for IgD, Aire, CD19 and DNA, and Bar: 20  $\mu\text{m}$ .

932 (G) Flow cytometric gating strategy for identifying mouse splenic non-GC (CD19<sup>+</sup>B220<sup>+</sup>GL7<sup>-</sup>  
933 FAS<sup>-</sup>), GC (CD19<sup>+</sup>B220<sup>+</sup>GL7<sup>+</sup>FAS<sup>+</sup>) B cells and plasma cells (CD19<sup>lo</sup>B220<sup>lo</sup>CD138<sup>+</sup>).

934 (H) Genotypes and Aire expression in ILN, splenic, peripheral blood and peritoneal B cells of a  
935 litter of *Aire*<sup>Adig</sup> mice after 1 dose of i.p. SRBC immunization with or without CFA.

936 (I) Percentage of GFP<sup>+</sup> B cells (mean  $\pm$  SEM) in splenic GC B cells of *Aire*<sup>Adig</sup> transgene-  
937 positive mice ( $n = 5$ ) after 1 dose of i.p. SRBC immunization with CFA. The dotted line  
938 indicates of mean value of GFP<sup>+</sup> B cells in splenic non-GC B cells of these mice.



939 (J) AIRE expression in mouse peripheral blood, splenic, MLN, PP, peritoneum and thymic B  
940 cells of B6.*Aire*<sup>Adig</sup> mice after 1 dose of i.p. SRBC immunization without CFA. The data are  
941 representative of 6 B6.*Aire*<sup>Adig</sup> and 6 B6 mice that were age- and sex-matched and housed in the  
942 same SPF room.

943

944 **Figure S2. *Aire*<sup>+/+</sup> and *Aire*<sup>-/-</sup> Donor BM and B Cells Had a Similar Phenotype**  
945 **Before Transfer, Related to Figure 3.**

946 (A) Flow cytometric analysis of CD45.1<sup>+</sup> *Aire*<sup>+/+</sup> and CD45.2<sup>+</sup> *Aire*<sup>-/-</sup> donor BM before and after  
947 B220 cell depletion.

948 (B) Flow cytometry analysis of splenic naive resting B cells that were purified from the spleens  
949 of primary  $\mu$ MT chimeras of CD45.1<sup>+</sup> *Aire*<sup>+/+</sup> and CD45.2<sup>+</sup> *Aire*<sup>-/-</sup> BM and used as donor B cells  
950 for the secondary  $\mu$ MT chimeric hosts. The ratio of CD45.2<sup>+</sup> *Aire*<sup>+/+</sup> and CD45.2<sup>+</sup> *Aire*<sup>-/-</sup> splenic  
951 B cells were adjusted to be 1:1 prior to the secondary transfer.

952 (C) Representative purity of CD45.2<sup>+</sup> *Aire*<sup>+/+</sup> and CD45.2<sup>+</sup> *Aire*<sup>-/-</sup> littermate donor B cells before  
953 adoptive transfer into  $\mu$ MT hosts.

954 (D) Cell surface expression of CD21, CD23, CD38, CD40, CD62L, CD80, CD86, CD93, I-A<sup>b</sup>,  
955 BAFF-R and IgM and IgD on purified CD45.2<sup>+</sup> *Aire*<sup>+/+</sup> and CD45.2<sup>+</sup> *Aire*<sup>-/-</sup> littermate donor B  
956 cells before adoptive transfer, as determined by flow cytometry.

957 (E) NP<sub>8</sub>-to-NP<sub>36</sub> binding ratios (mean  $\pm$  SEM) of pre-immune splenic naive resting donor B cells  
958 of CD45.2<sup>+</sup> *Aire*<sup>-/-</sup>, CD45.2<sup>+</sup> *Aire*<sup>+/+</sup> and CD45.1<sup>+</sup> *Aire*<sup>+/+</sup> mice, by 1-way ANOVA with Tukey's  
959 post hoc test.

960 (F) Percentage of GL7<sup>+</sup>FAS<sup>+</sup> GC B cells in the spleens of  $\mu$ MT recipients of either *Aire*<sup>+/+</sup> or  
961 *Aire*<sup>-/-</sup> B cells that were immunized i.p. with NP<sub>32</sub>-KLH. Flow cytometry was performed 4 d  
962 after the last immunization.

963 (G) Cell surface expression of the co-stimulatory or co-inhibitory molecules CD80, CD86, PD-  
964 L1, PD-L2 and ICOSL on GL7<sup>+</sup>FAS<sup>+</sup> GC B cells in the spleens of  $\mu$ MT recipients after  
965 immunizations. Shaded histograms indicate the staining using isotype-matched control  
966 antibodies.

967 (H and I) Percentage of splenic PD-1<sup>+</sup>CXCR5<sup>+</sup> T<sub>FH</sub> cells and PD-1<sup>+</sup>CXCR5<sup>+</sup>Foxp3<sup>+</sup>CD25<sup>+</sup> T<sub>FR</sub>  
968 cells in the spleens of immunized  $\mu$ MT recipients. The results shown represent 4 experiments,  
969 each consisting of B cells from 3–5 age- and sex-matched littermate donor mice and 6–8 age-  
970 and sex-matched littermate  $\mu$ MT recipient mice.

971 (J and K) Flow cytometric and statistical analyses of the percentages of total and intravascular B  
972 cells in thymic cells of  $\mu$ MT mice that received donor B cells after all the immunizations with  
973 NP<sub>32</sub>-KLH. Age and sex-matched unimmunized  $\mu$ MT mice were included as controls. The data are  
974 represented as mean  $\pm$  SEM.

975 (L) The sorting and sequencing strategies for *Aire*<sup>+/+</sup> and *Aire*<sup>-/-</sup> donor B cells in  $\mu$ MT recipients after  
976 immunizations with NP<sub>32</sub>-KLH. NP-specific B cells were sorted based on NP<sub>36</sub> binding.

977

978 **Figure S3. *Aire*<sup>+/+</sup> and *Aire*<sup>-/-</sup> B Cells Showed Similar Proliferation and Apoptosis *in***  
979 ***vitro*, Related to [Figure 3](#).**

980 (A and B) CFSE dilution in purified splenic B cells from age- and sex-matched littermate donor  
981 *Aire*<sup>+/+</sup> and *Aire*<sup>-/-</sup> mice treated with medium (Control) or 5  $\mu$ g/ml anti-CD40 and 100 ng/ml IL-4  
982 for 4 or 6 d. Non-viable cells were excluded from the analysis.

983 (C) Statistical comparison of the percentage (mean  $\pm$  SEM) of CFSE<sup>10</sup> *Aire*<sup>+/+</sup> vs. *Aire*<sup>-/-</sup> splenic  
984 B cells ( $n = 3$ ) after 4 or 6 days of stimulation with 5  $\mu$ g/ml anti-CD40 and 100 ng/ml IL-4, by 2-  
985 tailed unpaired *t*-test. The results represent 3 independent experiments.

986 (D) Apoptosis of *Aire*<sup>+/+</sup> or *Aire*<sup>-/-</sup> B cells treated with medium (Control) or 500 ng/ml CD40L  
987 and 100 ng/ml IL-4 for 3 or 7 d, as determined by Annexin V and 7-AAD staining by flow  
988 cytometry. All results shown are representative of 3 experiments, each consisting of cells from  
989 2–3 age- and sex-matched littermate *Aire*<sup>+/+</sup> and *Aire*<sup>-/-</sup> mice.

990

991 **Fig. S4. Validation of *Aire*<sup>-/-</sup> CH12 Cell Clones, Related to Figure 4.**

992 (A) Verification of *Aire* mutations in CH12 clones by PCR using primers that only anneal to the  
993 WT sequence, giving no amplification in clones 43, 47 and 53. Clone 47 has a 3-bp deletion in  
994 both *Aire* alleles causing a single amino acid deletion, and hence was not used in experiments.

995 (B) Verification of *Aire* mutations in both alleles of CH12 clone 69 by PCR showing no  
996 amplification using primer pair #2 which anneals to the WT but not the mutated sequence.  
997 Primer pair #1 amplifies a sequence immediately downstream of the mutation site, and primer pair  
998 #3 is specific for the single-stranded repair template used in CRISPR.

999 (C) Western Blot analysis of AIRE protein expression in WT and *Aire*<sup>-/-</sup> CH12 cells.

1000 (D) Flow cytometric analysis of apoptosis by Annexin V and 7-AAD staining of WT and *Aire*<sup>-/-</sup>  
1001 CH12 cells treated with medium (Control) or anti-CD40, TGF- $\beta$ 1 and IL-4 for 3 d.

1002 (E) Percentages of late (Annexin V<sup>+</sup>7-AAD<sup>+</sup>) and early (Annexin V<sup>+</sup>7-AAD<sup>-</sup>) apoptotic cells  
1003 (mean  $\pm$  SEM) in WT and *Aire*<sup>-/-</sup> CH12 cells treated with medium (Control) or anti-CD40, TGF-  
1004  $\beta$ 1 and IL-4 for 3 d. \* $P < 0.05$ , by 2-tailed *t*-test. The data in D and E represent 4 experiments.

1005

1006 **Fig. S5. AIRE and AID Co-localize in the Nuclei of GC B Cells, Related to Figure 5.**

1007 (A–E) Imaging flow cytometry of AIRE and AID in tonsillar IgD<sup>-</sup>CD38<sup>+</sup> GC, IgD<sup>+</sup>CD38<sup>-</sup> naive,  
1008 IgD<sup>-</sup>CD38<sup>-</sup> switched memory B cells, IgD<sup>-</sup>CD38<sup>hi</sup> switched PCs and IgD<sup>+</sup>CD38<sup>+</sup> founder GC  
1009 (FGC) B cells of a healthy donor. DNA was counter stained with DAPI. Samples stained with  
1010 isotype-matched control antibodies were used to define the fluorescence baseline for AIRE and  
1011 AID. Four representative cells in each population stained with AIRE and AID or with isotype  
1012 control antibodies were shown. Bars: 7 μm.

1013

1014 **Figure S6. AID Interacts with AIRE in B Cells, Related to Figure 5 and Figure 6.**

1015 (A) Co-IP of AIRE and AID in tonsillar CD19<sup>+</sup> total, IgD<sup>+</sup> naive, and FGC and CD19<sup>+</sup>IgD<sup>-</sup> GC  
1016 and memory B cells of a healthy donor after treatment of the cell lysates with DNase I. PCR  
1017 amplification of β-Actin gDNA in DNase I-treated or untreated cells was also performed.

1018 (B) Co-IP of AIRE and AID in splenic B cells of immunized WT or *Aicda*<sup>-/-</sup> mice. The data  
1019 represent 2 experiments.

1020 (C) Co-IP of AID with pSer5-Pol II, total Pol II, Spt5 and Aire in WT and *Aire*<sup>-/-</sup> CH12 cells after  
1021 72 h of treatment without or with anti-CD40, TGF-β and IL-4. The results represent 3 experiments.

1022

1023 **Figure S7. AIRE Deficiency in B Dells Impairs Skin T<sub>H</sub>17 Immunity against *C.***  
1024 ***albicans*, Related to Figure 7.**

1025 (A) Levels of autoantibodies (mean ± SEM) binding to IL-17A, IL-17F and IL-22 in the sera of  
1026 μMT recipient mice of *Aire*<sup>+/+</sup> or *Aire*<sup>-/-</sup> donor B cells 4 d after infection. \**P* < 0.05, \*\**P* < 0.01,  
1027 by 1-tailed unpaired *t*-test.

1028 (B) Flow cytometric gating strategy for identifying mouse skin viable T cells after *ex vivo* re-  
1029 stimulation. T cells downregulation CD3 or TCR after *ex vivo* stimulation with PMA and  
1030 ionomycin; thus CD3<sup>+</sup> or TCRβ<sup>+</sup> events were gated for analysis. This gate also included TCRγδ<sup>+</sup>  
1031 T cells, which were CD3<sup>+</sup>.

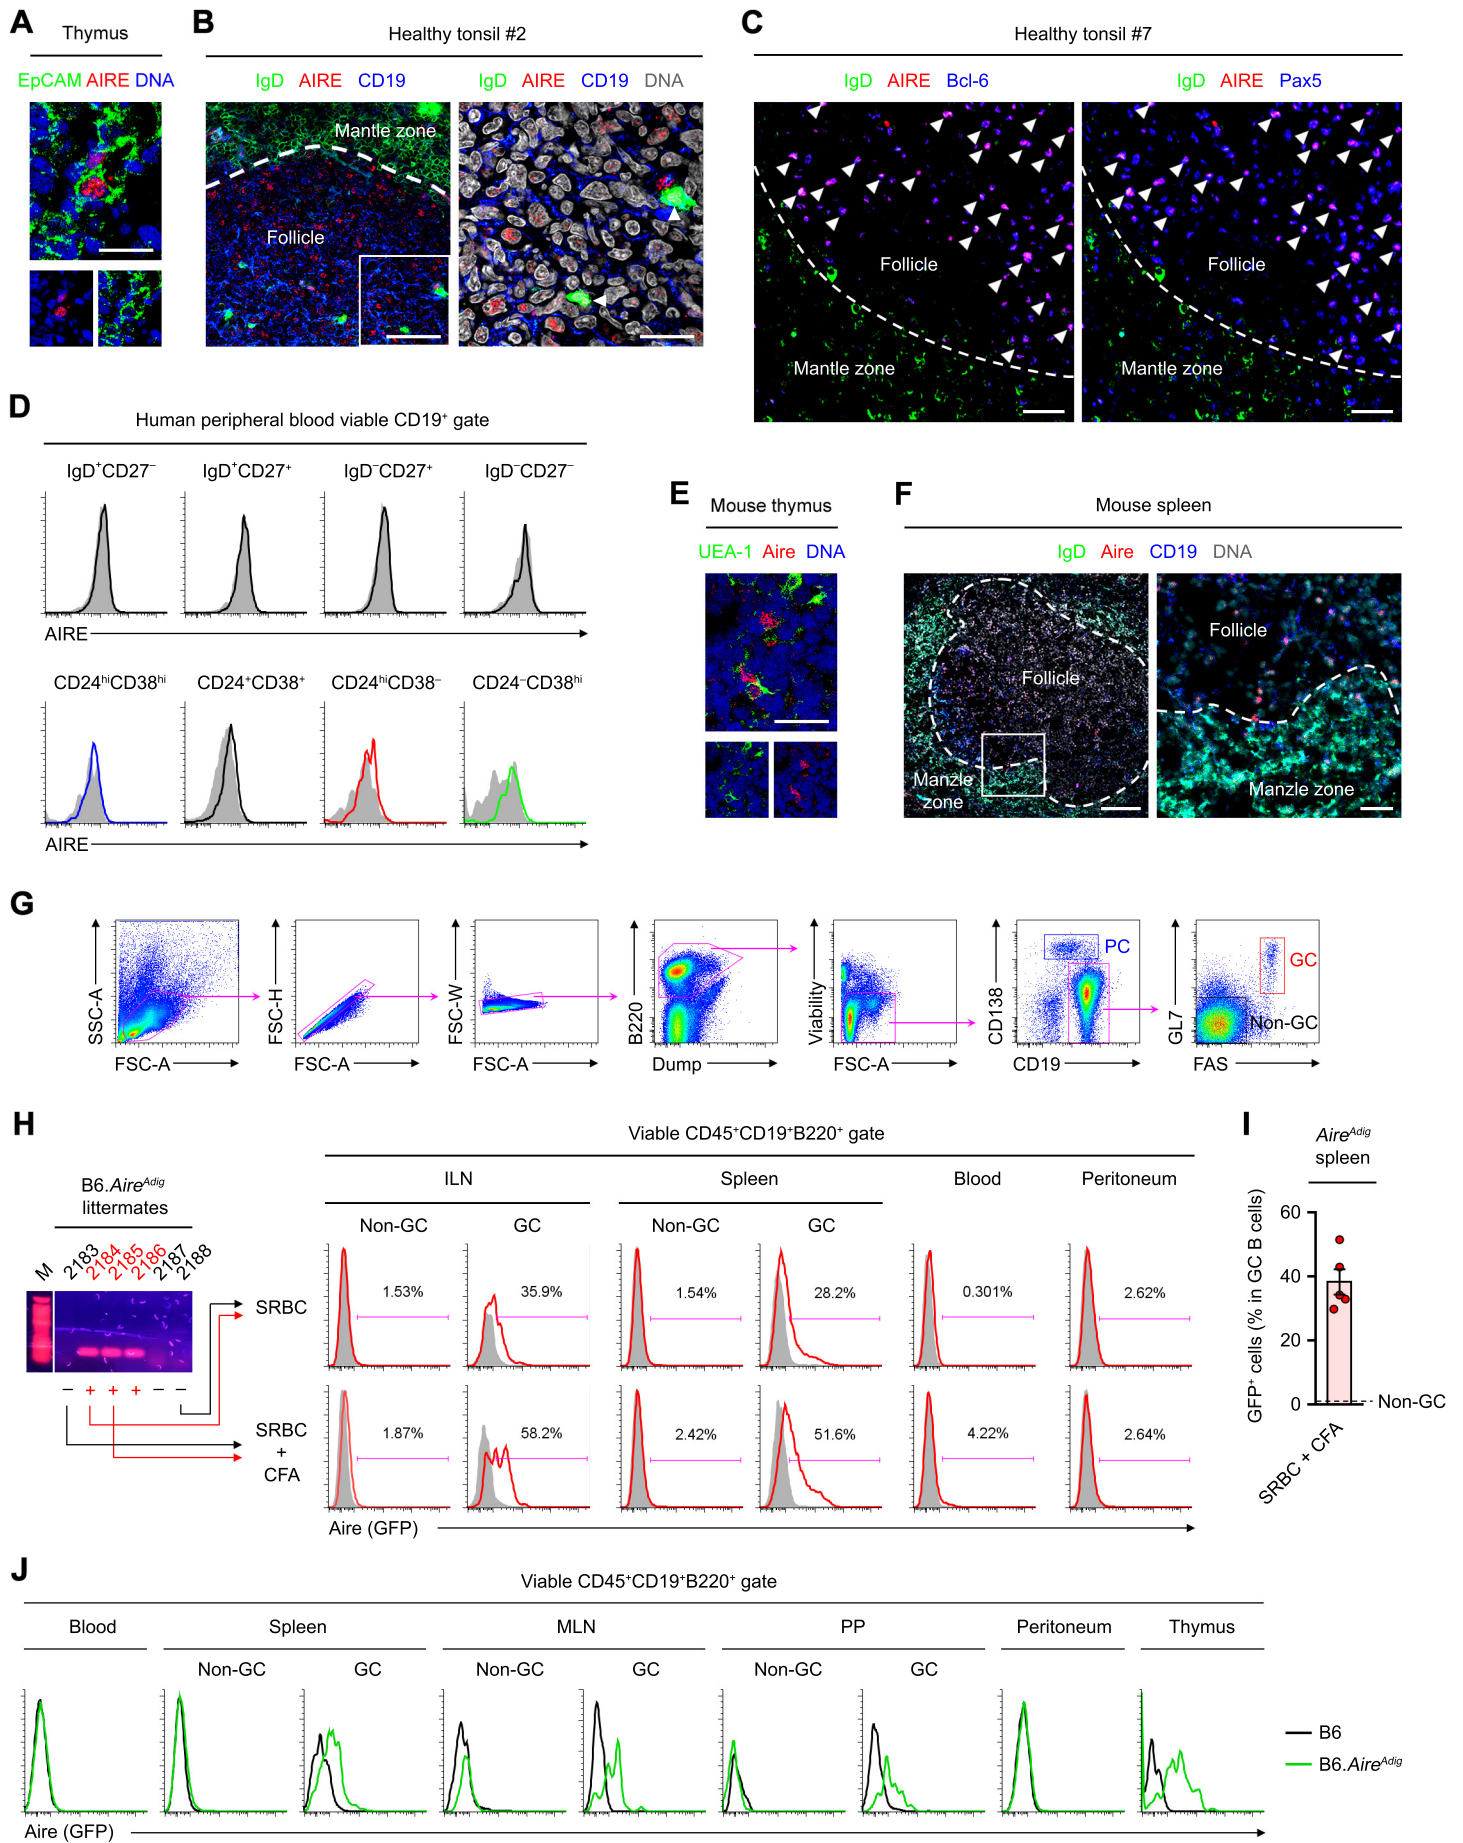

Figure S1

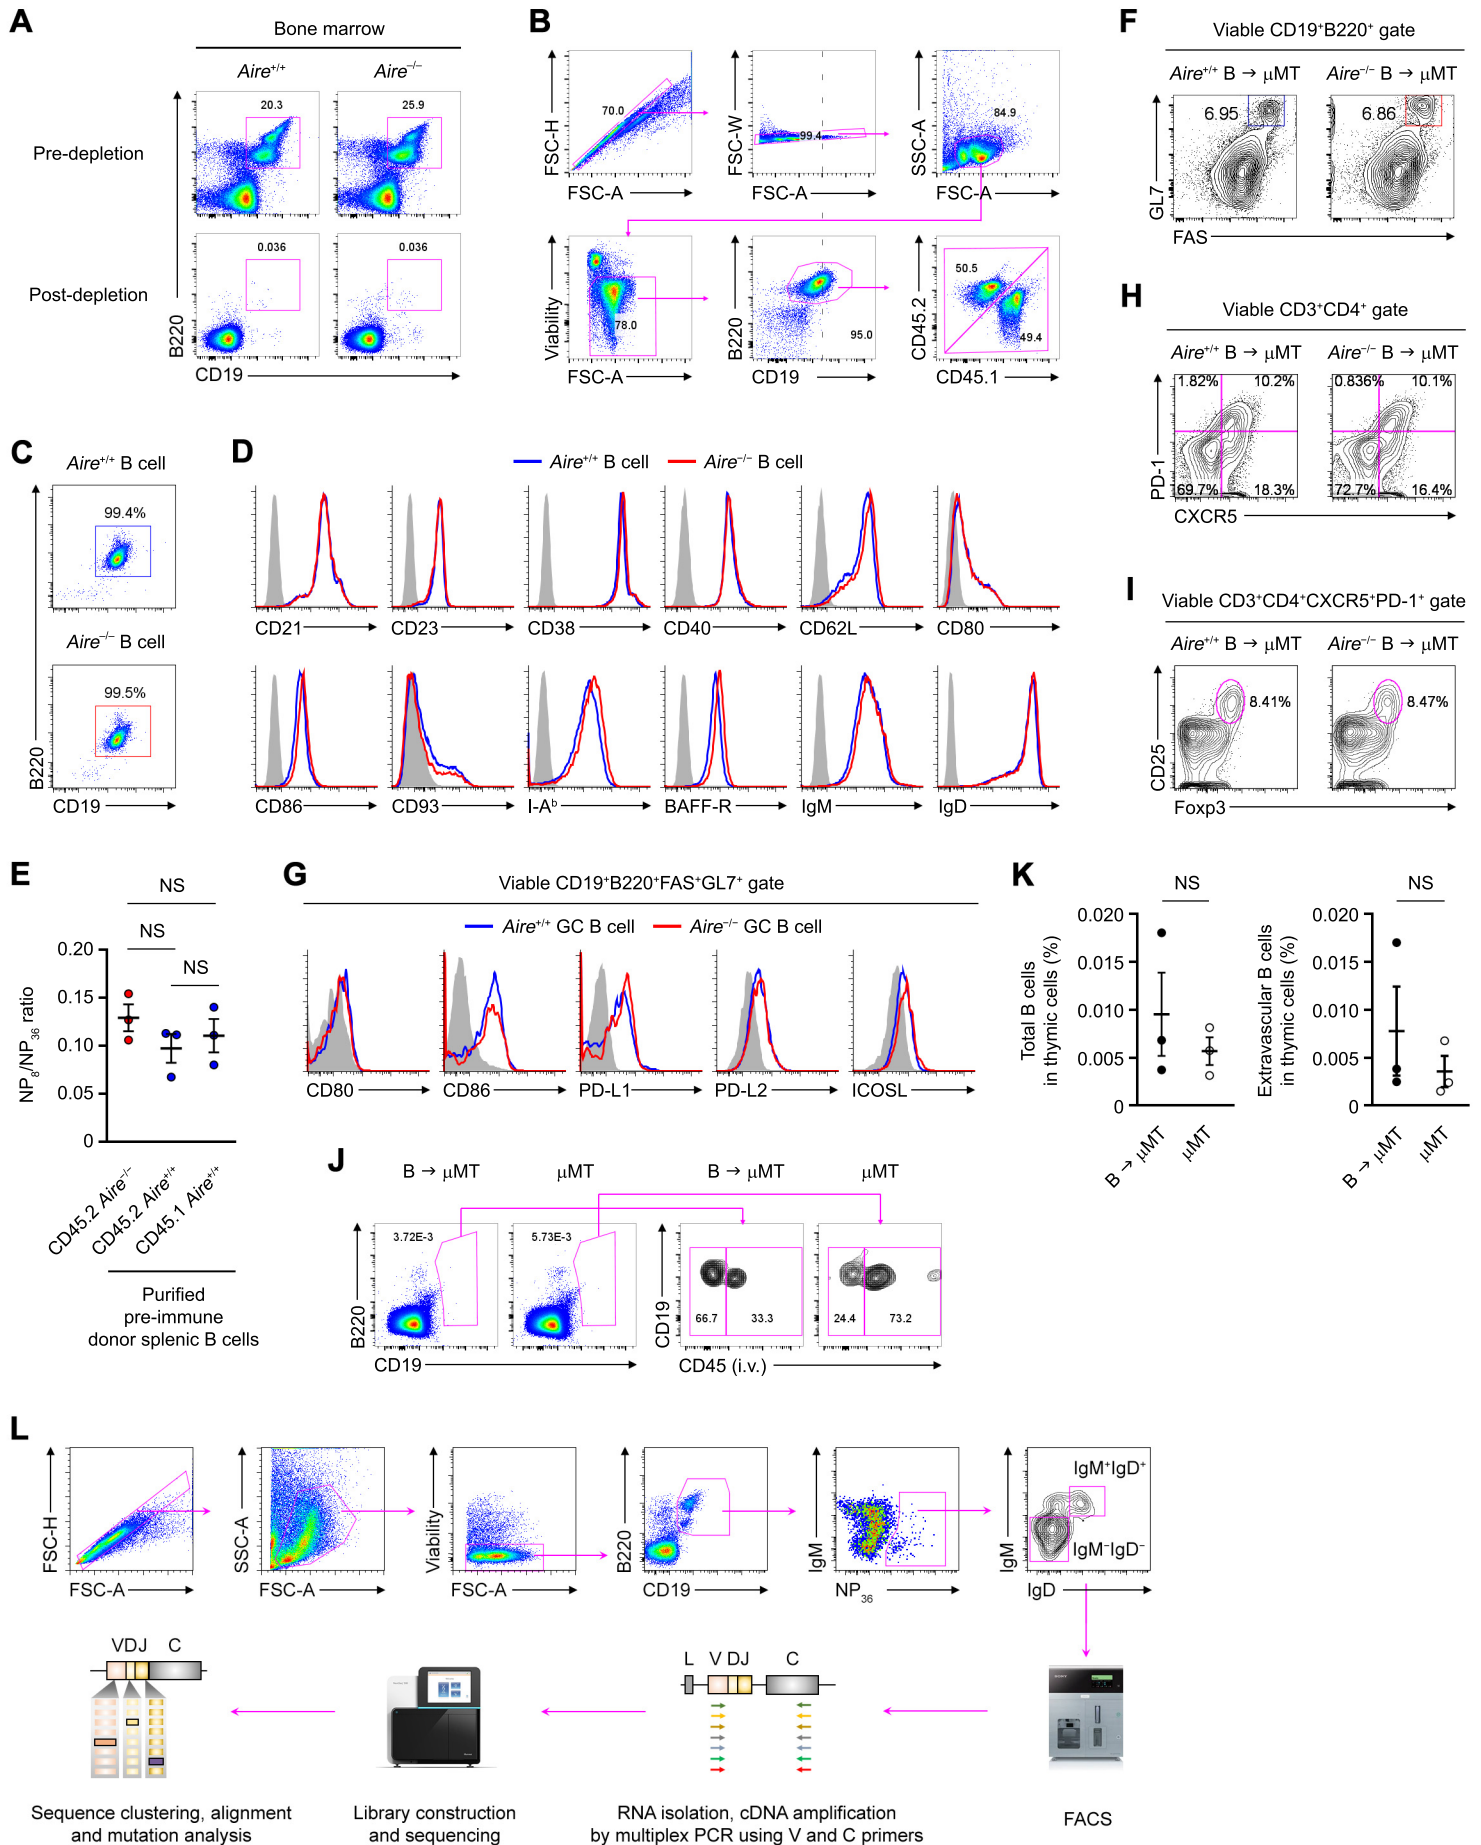

Figure S2

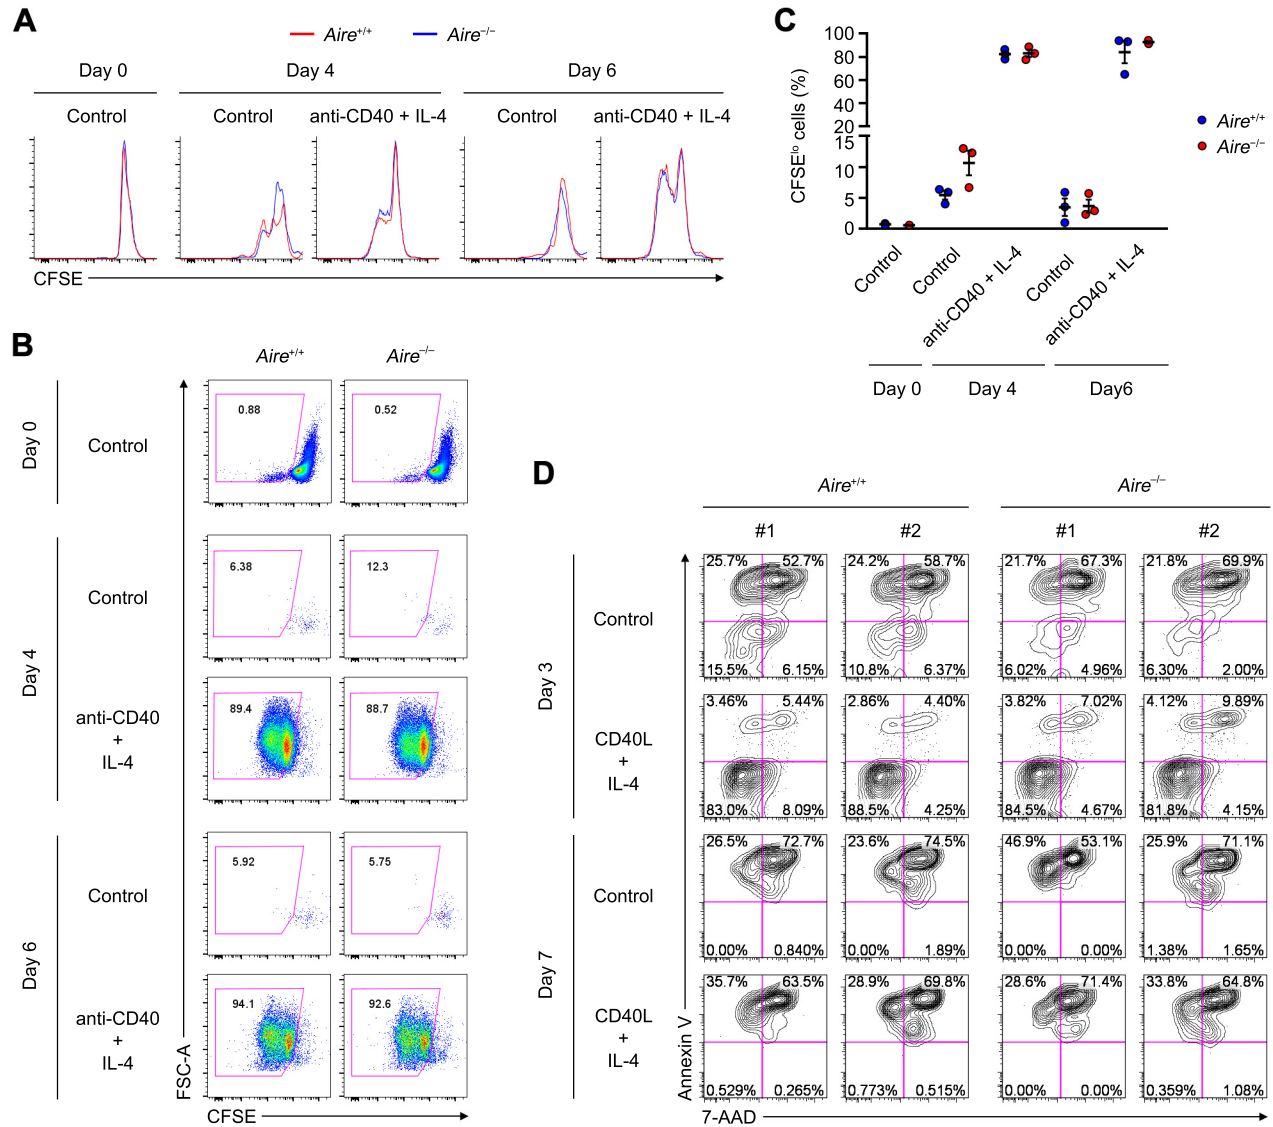

Figure S3



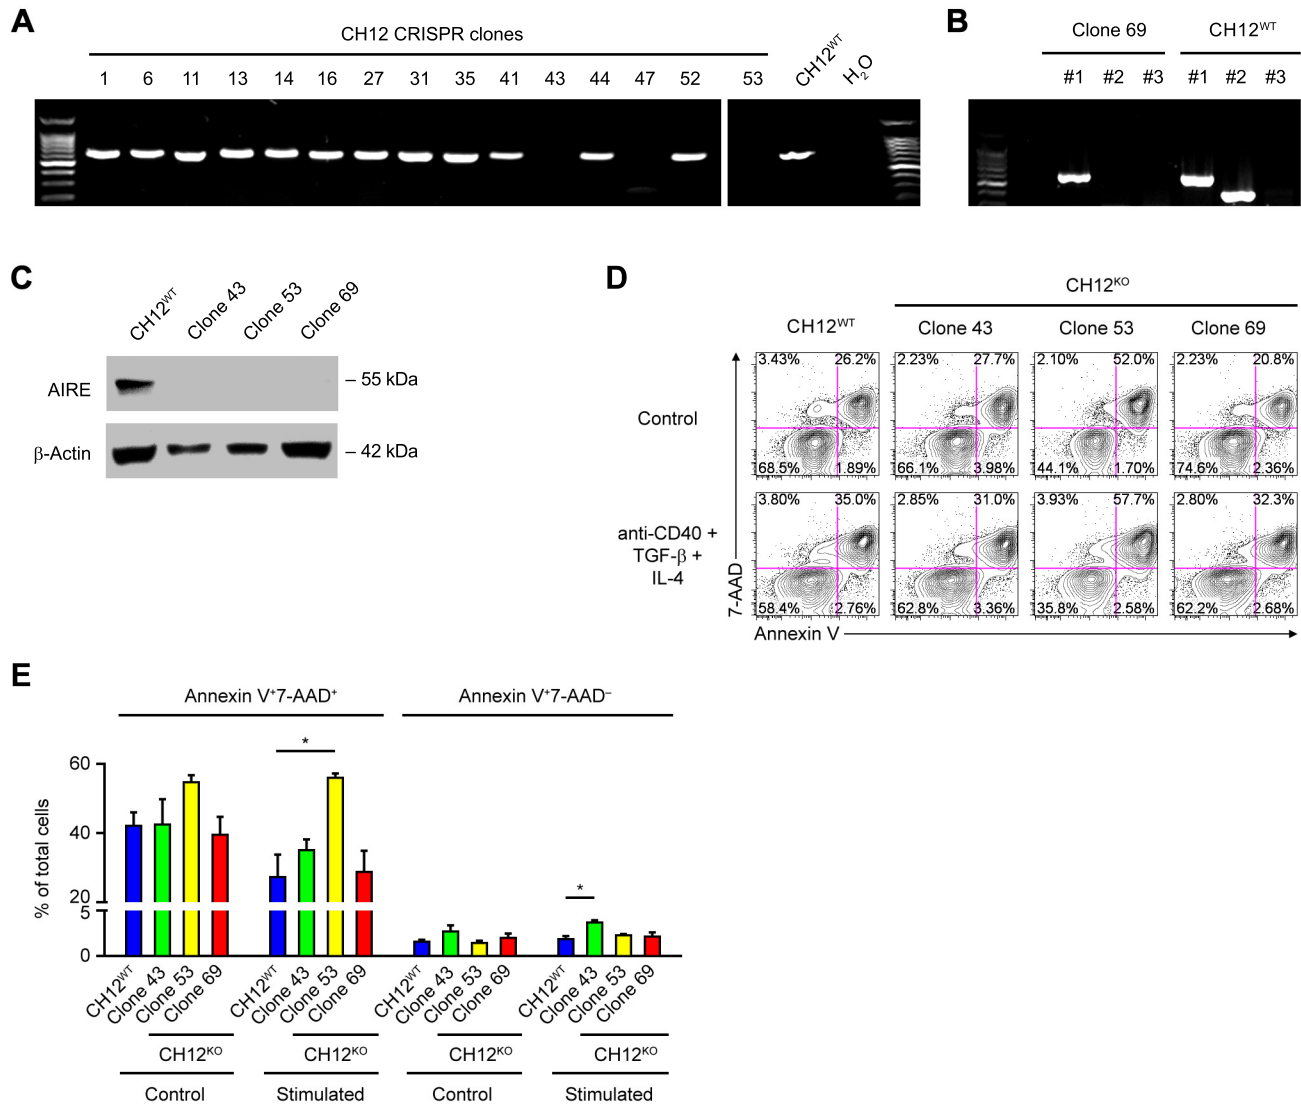

Figure S4

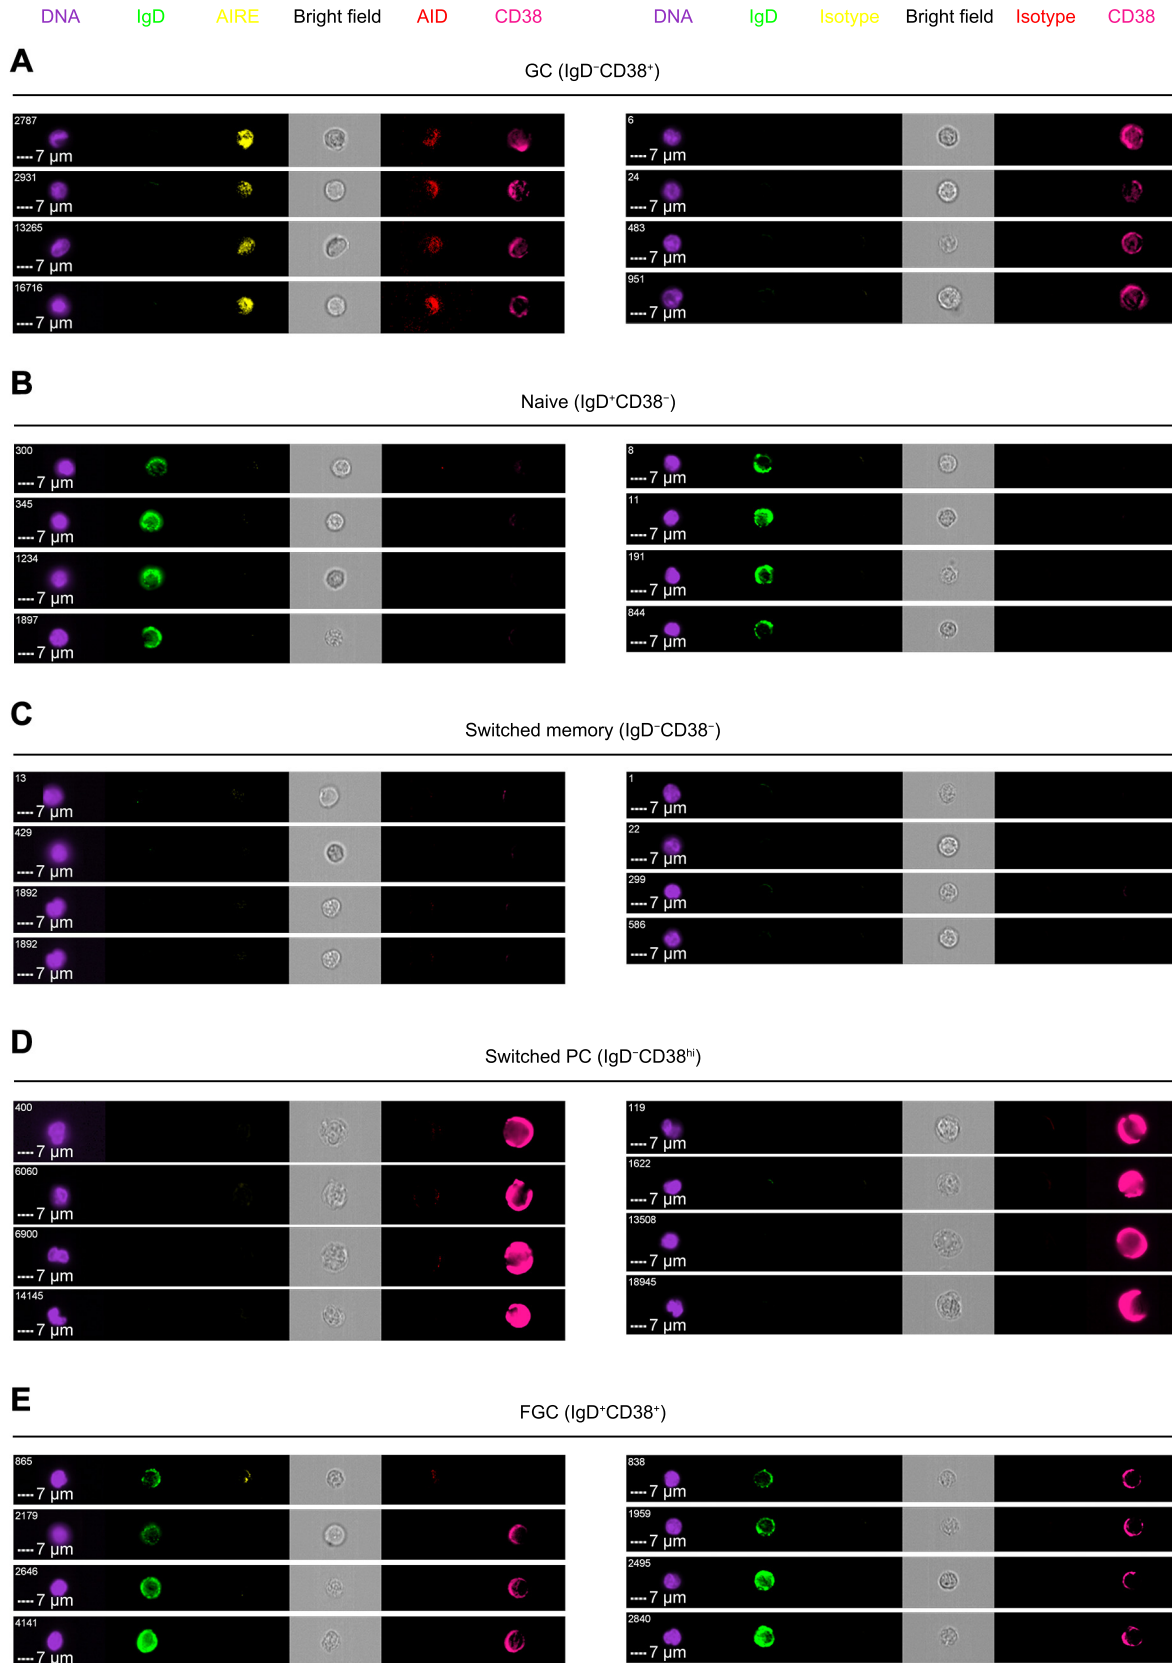

Figure S5

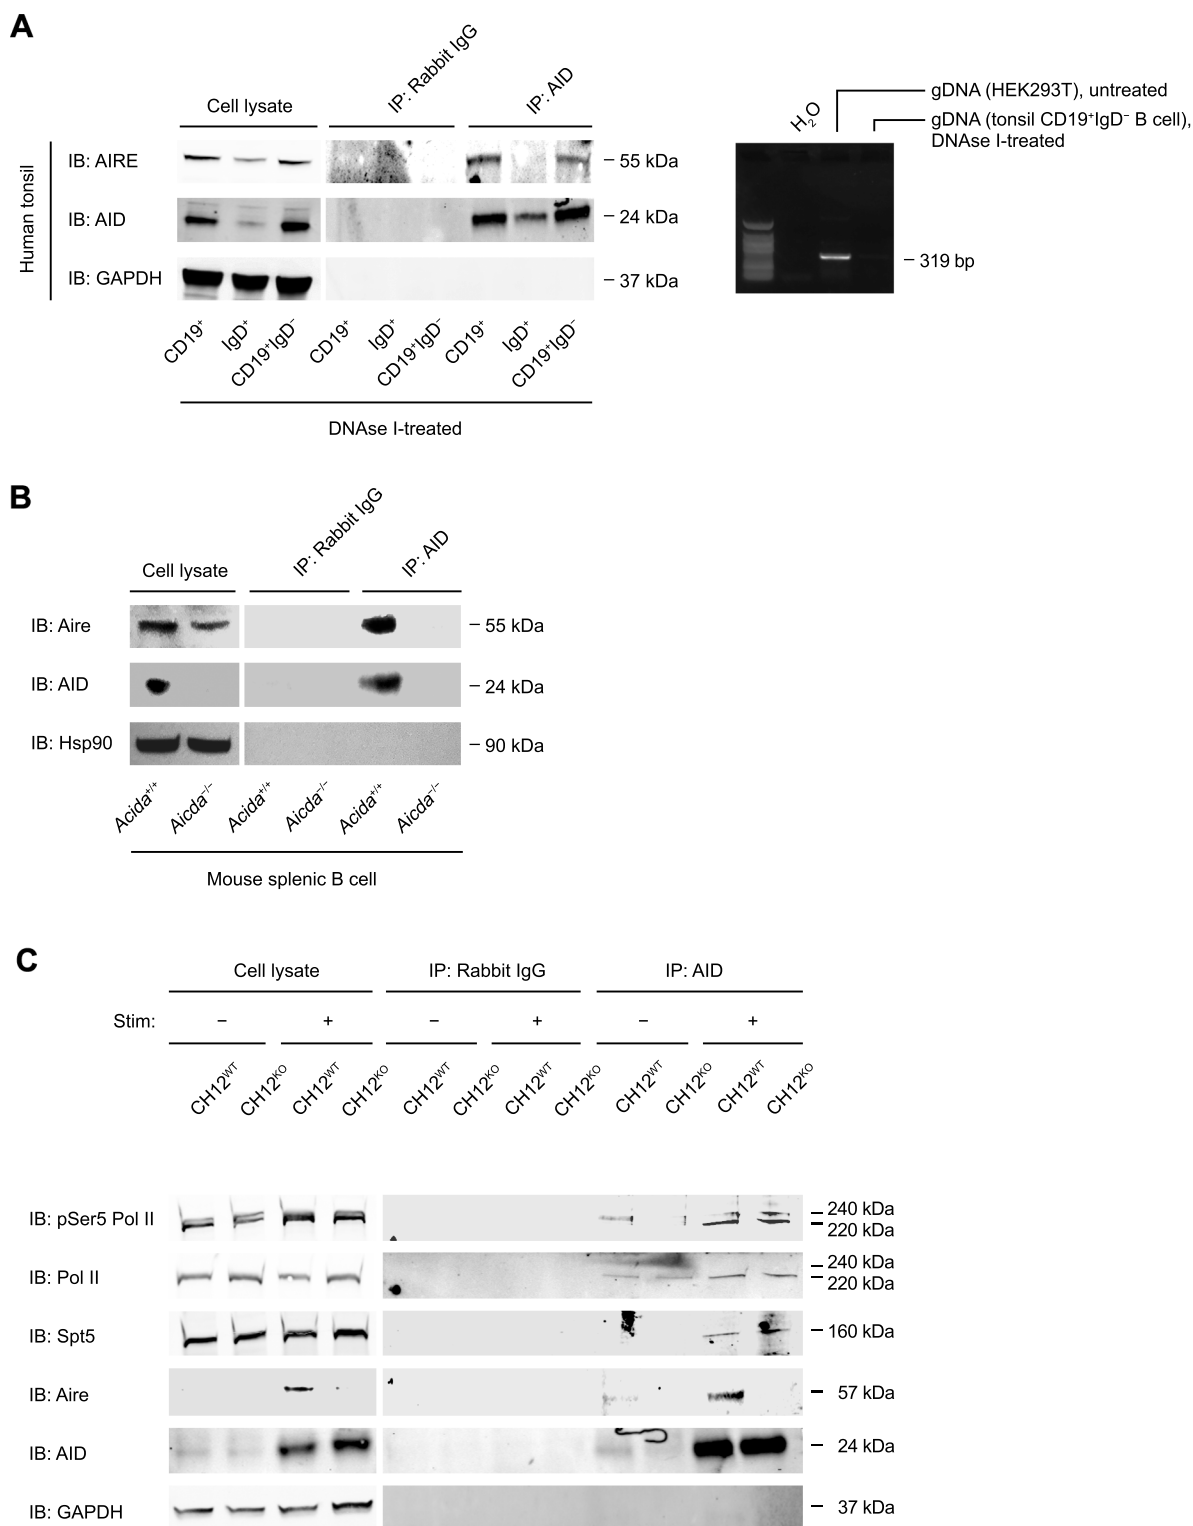

Figure S6

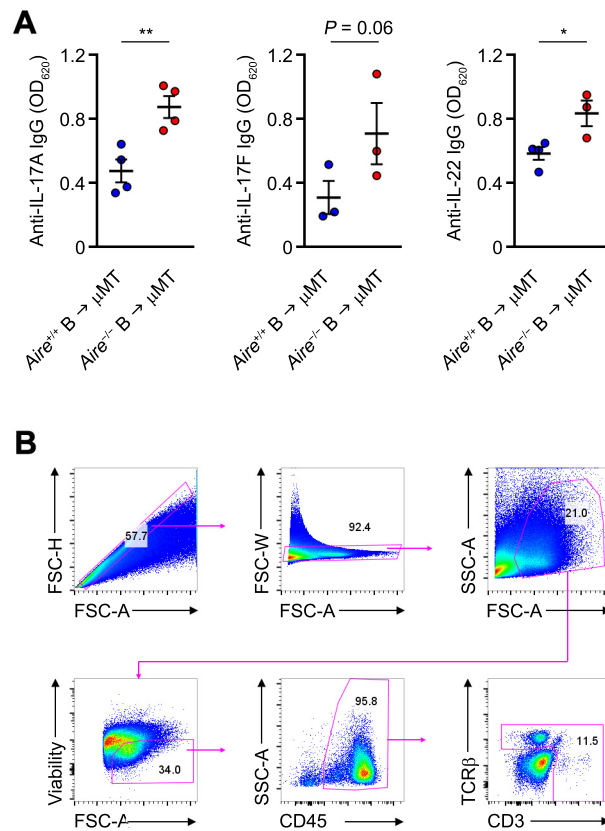

Figure S7
